# Supplementary material for: Composition of linear and branched short-chain fatty acids in human milk and newborn feces: influence of perinatal and maternal factors
Source: Royal Society of Chemistry journal article supplement (doi:10.1039/d4fo03568b), 2024-12-05
Supplement: d4fo03568b2.pdf [file d4fo03568b2.pdf]

**Supplementary Table 1.** Timeline for variables collected during postpartum home visits.

| Time postpartum                                                                     | 3–7 days                                                                                                                                                                                                                                                                       | 14–15 days                             | 30 days                                                                                                                                         |
|-------------------------------------------------------------------------------------|--------------------------------------------------------------------------------------------------------------------------------------------------------------------------------------------------------------------------------------------------------------------------------|----------------------------------------|-------------------------------------------------------------------------------------------------------------------------------------------------|
| Variable                                                                            |                                                                                                                                                                                                                                                                                |                                        |                                                                                                                                                 |
| <b>Mother</b>                                                                       |                                                                                                                                                                                                                                                                                |                                        |                                                                                                                                                 |
| Source                                                                              | Signing of informed consent letter<br>Questionnaire ( <i>n</i> = 92)                                                                                                                                                                                                           |                                        | Questionnaire ( <i>n</i> = 92)<br>• A multiple-pass 24-hour recall<br>Anthropometry<br>• BW<br>• Height<br>Body composition<br>• Total body fat |
|    | <ul style="list-style-type: none"> <li>• Age</li> <li>• Height</li> <li>• Pre-pregnancy BW</li> <li>• Infant at birth                             <ul style="list-style-type: none"> <li>❖ Sex</li> <li>❖ BW</li> <li>❖ Length</li> </ul> </li> <li>• Delivery mode</li> </ul> |                                        |                                                                                                                                                 |
| Source                                                                              | Human milk ( <i>n</i> = 23)<br>• SCFAs                                                                                                                                                                                                                                         | Human milk ( <i>n</i> = 23)<br>• SCFAs | Human milk ( <i>n</i> = 92)<br>SCFAs                                                                                                            |
| <b>Infant</b>                                                                       |                                                                                                                                                                                                                                                                                |                                        |                                                                                                                                                 |
|  | Anthropometry ( <i>n</i> = 92)<br>• Length<br>• BW<br>• HC                                                                                                                                                                                                                     |                                        | Anthropometry ( <i>n</i> = 92)<br>• Length<br>• BW<br>• HC<br>Feces ( <i>n</i> = 36)                                                            |
| Source                                                                              |                                                                                                                                                                                                                                                                                |                                        |                                                                                                                                                 |
| BW = Body Weight; HC = Head Circumference; SCFAs = Short Chain Fatty Acids.         |                                                                                                                                                                                                                                                                                |                                        |                                                                                                                                                 |
